# Supplementary material for: Electrocatalytic CO2 reduction by a cobalt porphyrin mini-enzyme
Source: Royal Society of Chemistry journal article supplement (doi:10.1039/d4sc07026g), 2025-01-01
Supplement: d4sc07026g1.pdf [file d4sc07026g1.pdf]

## Supporting Information

### Electrocatalytic CO<sub>2</sub> reduction by a cobalt porphyrin mini-enzyme

Alison A. Salamatian<sup>a</sup>, Jose L. Alvarez-Hernandez<sup>a</sup>, Karishma B. Ramesh<sup>a</sup>, Linda Leone<sup>b</sup>, Angela Lombardi<sup>b</sup>, Kara L. Bren<sup>\*a</sup>

<sup>a</sup>*Department of Chemistry, University of Rochester, Rochester, NY 14627-0216, USA*

<sup>b</sup>*Department of Chemical Sciences, University of Naples Federico II, Complesso Universitario Monte S. Angelo, via Cintia 45, 80126 Naples, Italy*

\*email: kara.bren@rochester.edu

#### **Table of Contents**

|                                                             |     |
|-------------------------------------------------------------|-----|
| <b>Experimental details</b> .....                           | S2  |
| <b>Comparison data on related systems</b> .....             | S8  |
| <b>Results of CPEs of CoMC6*a in MOPS, CHES, CAPS</b> ..... | S10 |
| <b>Additional CV data</b> .....                             | S17 |
| <b>Extended (24-hour) CPE experiments</b> .....             | S19 |
| <b>GC calibration curves and chromatogram</b> .....         | S20 |

## Experimental details

### CoMC6\*a preparation and characterization

CoMC6\*a was prepared and purified as previously described.<sup>1,2</sup> CoMC6\*a stock solutions in doubly deionized water were stored at -80 °C. The concentration of CoMC6\*a was determined from UV-vis spectroscopy in doubly deionized water using the extinction coefficient previously reported.<sup>1,3</sup>

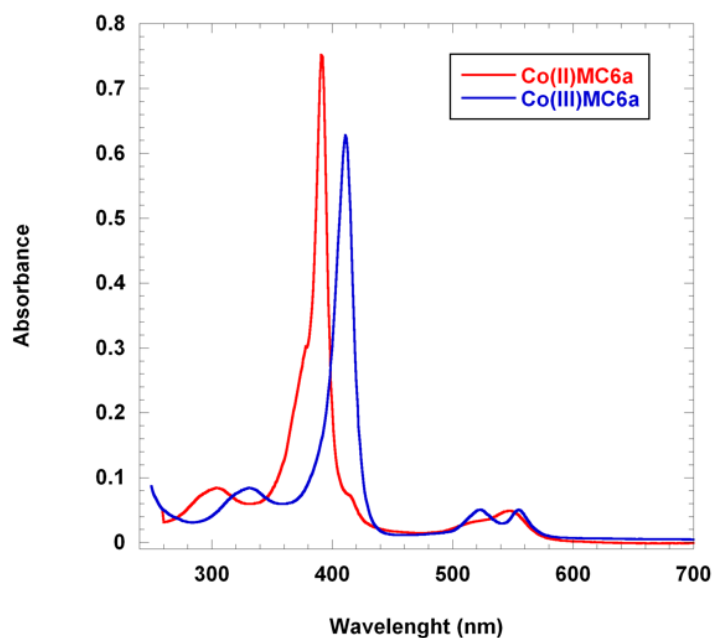

**Figure S1.** UV-vis absorption spectra of 4.2  $\mu\text{M}$  Co(III)MC6\*a (blue) and Co(II)MC6\*a (red) in  $\text{H}_2\text{O}$ , 0.1% TFA (pH 2). Co(II)MC6\*a was obtained by treating the solution with excess sodium dithionite.

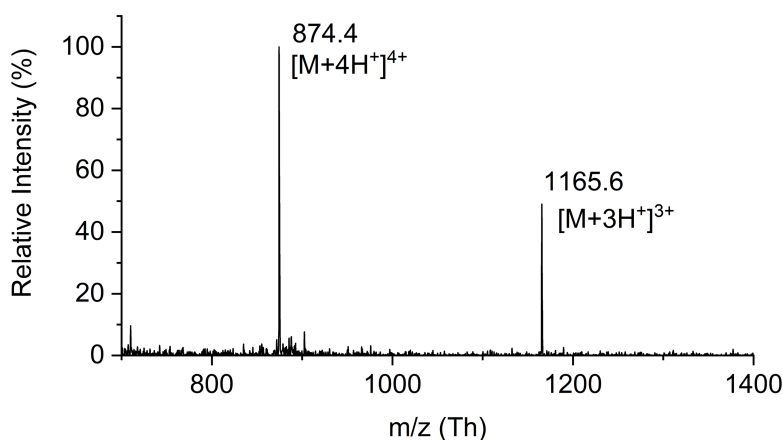

**Figure S2.** ESI-MS spectrum of  $\text{Co}^{\text{III}}\text{-MC6}^*\text{a}$ . The peaks at  $m/z$  1165.6 and 874.4 correspond to the  $[\text{M}+3\text{H}^+]^{3+}$  and  $[\text{M}+4\text{H}^+]^{4+}$  ions, respectively. These values are consistent with theoretical mass value of 3493 Da.

### Cyclic voltammetry

All cyclic voltammetry (CV) experiments were conducted on a CH Instruments 620D or 720E potentiostat with automatic iR compensation enabled. Experiments used a three-electrode configuration with a  $\text{Ag}/\text{AgCl}/\text{KCl}_{(1\text{M})}$  reference electrode (CHI111), a Pt wire counter electrode (CHI115, surface area in solution  $\sim 0.14 \text{ cm}^2$ ), and a mercury drop electrode (BASi CGME MF-9058 used in static mode) as the working electrode (surface area  $\sim 2.45 \times 10^{-2} \text{ cm}^2$ ). Voltammograms were collected by first by scanning from higher potential to lower (more negative) potential, and then back to the less negative potential. The use of a mercury electrode negates concerns about nanoparticle formation because mercury amalgamates cobalt. The CV working solution was purged with  $\text{N}_2$  for at least 5 minutes and, for experiments under  $\text{CO}_2$ , an additional 15 minutes with  $\text{CO}_2$  before each experiment. The cell was kept under an atmosphere of  $\text{N}_2$  or  $\text{CO}_2$  during experiments. CV scans were collected from 0 V to negative potentials and then back to 0 V. For experiments under  $\text{CO}_2$ , pH of solutions containing 4-morpholinepropanesulfonic acid (MOPS) was initially adjusted to  $\sim 7$ . The pH of solutions of 3-(cyclohexylamino)-1-ethanesulfonic acid (CHES) was initially adjusted to  $\sim 9$ . The pH of solutions

of 3-(cyclohexylamino)-1-propanesulfonic acid (CAPS) was initially adjusted to  $\sim 10.5$  to enhance solubility. Purging the solutions used in experiments  $\text{CO}_2$  then changed the pH of the solution to  $\sim 6$  from these starting points. The pH values of samples under  $\text{N}_2$  was adjusted to match the pH values of the corresponding experiments under  $\text{CO}_2$  using small (microliter) amounts of concentrated HCl.

### **Dip-and-stir test**

The dip-and-stir test is a version of the typical rinse test, adapted to a mercury drop electrode. {Alvarez Bren 2021} After a single CV scan is collected on a mercury drop exposed to the catalyst containing solution, or after exposing the mercury drop to the catalyst solution for one minute, the electrochemical cell is removed and the counter and reference electrodes are carefully wiped, while the mercury drop remains at the tip of the capillary. The electrodes are then dipped into an electrochemical cell containing fresh solution with no catalyst. The solution is stirred for 3 minutes using a magnetic stir bar to remove any catalyst-containing droplets from the electrodes and purged with either  $\text{CO}_2$  for 5 minutes. A CV is then collected and any above-background activity detected is due to catalyst adsorbed to the mercury drop. More information regarding this adsorption test can be found in reference {Alvarez Bren 2021}.

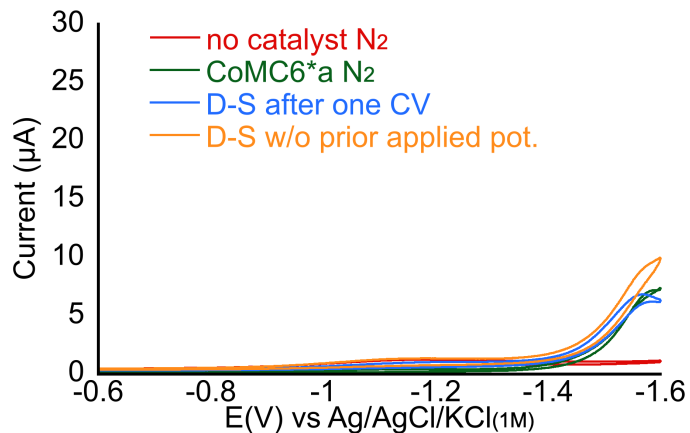

**Figure S3.** Results of dip-and-stir test for 1  $\mu\text{M}$  CoMC6\*a in 50 mM CAPS pH 6.5 under 1 atm  $\text{N}_2$ . Scan rate 100 mV/s

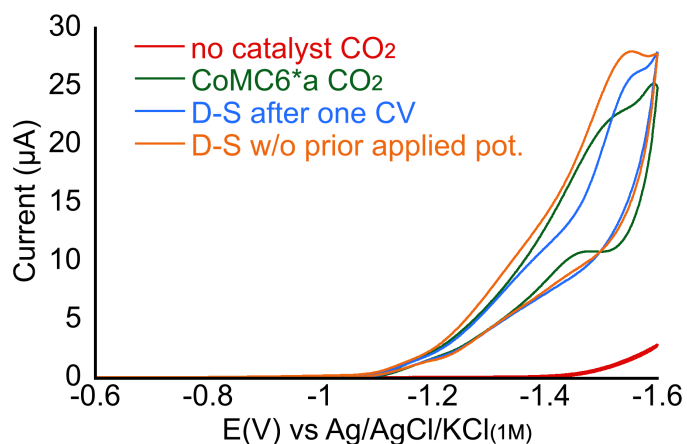

**Figure S4.** Results of dip-and-stir test for 1  $\mu\text{M}$  CoMC6\*a in 50 mM CAPS pH 6.5 under 1 atm  $\text{CO}_2$ . Scan rate 100 mV/s

### Controlled potential electrolysis

Controlled potential electrolysis (CPE) were performed on a CH Instruments 620D or 720E potentiostat. Experiments were performed in a two-compartment cell (H-cell) with a P5 glass frit

with average pore size of 1.0 – 1.5  $\mu\text{m}$ . The working compartment contained the reference Ag/AgCl/KCl<sub>(1M)</sub> electrode, and working mercury pool electrode with a surface area of  $\sim 2.0\text{ cm}^2$ , connected to the circuit by an insulated platinum wire. The counter compartment contained a glassy carbon rod counter electrode (surface area  $\sim 2.5\text{ cm}^2$ ). Buffers (500 mM MOPS, CHES, or CAPS, with 1 M KCl) were prepared by dissolving solid in doubly deionized water (prepared with a NanoPure system) and adjusted to the desired pH with HCl or NaOH. The working and counter compartments were filled with 5 mL and 6 mL of solution, respectively, to allow the appropriate surface area of contact with the counter electrode. The solutions were sparged with N<sub>2</sub> (5 minutes) then with 95:5% CO<sub>2</sub>/CH<sub>4</sub> (15 minutes; Airgas) or with 80:20% N<sub>2</sub>/CH<sub>4</sub> (20 minutes; Airgas) prior to each experiment. The CH<sub>4</sub> served as an internal standard. CPE experiments in the presence of MOPS were conducted as previously reported, with the H-cell headspace connected with 2 needles and fine tubing.<sup>4</sup> Solutions of MOPS, CHES, and CAPS were initially adjusted to pH 7, 9, 10.5, respectively; after purging with CO<sub>2</sub>, pH stabilized at  $6.5 \pm 0.2$ . For experiments under N<sub>2</sub>, all solutions were initially prepared at pH 7, and then adjusted to match the pH of the corresponding experiment conducted under CO<sub>2</sub>. CPE data was background corrected, where the background consisted of the CPE experiment run under the same conditions but without catalyst present.

### **Preparation of samples for investigation of air tolerance**

To prepare solutions with dissolved CO<sub>2</sub> but under different headspace gases, a solution was first sparged with CO<sub>2</sub> for 15 minutes, after which before the headspace was purged with either N<sub>2</sub> or air for 5 minutes.

## **Gas chromatography**

A gas chromatography-2014 Fuel Cell Analyzer (Shimadzu) with a methanizer and thermal conductivity and flame ionization detectors was used to determine the amount of H<sub>2</sub> and CO present in headspace gas. Known volumes of H<sub>2</sub> and CO were injected alongside CH<sub>4</sub> as an internal standard to produce calibration curves. A unique calibration curve was produced for each type of reaction vessel purged with the desired gas (N<sub>2</sub> or CO<sub>2</sub> with methane) and containing doubly deionized water at the respective volume of the reaction solution. Determination of turnover number (TON) and faradaic efficiency (FE) values was as previously described.<sup>4</sup>

## **Formate analysis**

Analysis for formate formation used the Formate Assay Kit from Sigma-Aldrich according to the manufacturer's instructions.

## Comparison data on related systems

**Table S1.** Comparison of the activity and selectivity of engineered biomolecular catalysts for CO<sub>2</sub> reduction.

| CO <sub>2</sub> Reduction Semi-synthetic Biomolecular Catalysis in Water |                                       |                   |                              |                        |             |                                                 |
|--------------------------------------------------------------------------|---------------------------------------|-------------------|------------------------------|------------------------|-------------|-------------------------------------------------|
| Catalyst                                                                 | Photosensitizer                       | TON <sub>CO</sub> | TON <sub>H<sub>2</sub></sub> | Selectivity            | Runtime (h) | Reference                                       |
| Ni(cyclam)@Cu-azurin                                                     | [Ru(bpy) <sub>3</sub> ] <sup>2+</sup> | 38                | NA                           | NA                     | 5           | Chem. Commun. 2016, 52, 9889-9892.              |
|                                                                          |                                       | 12                | 140                          | 8% (78% for Zn-azurin) | 2           |                                                 |
| PSP-Ni(II)-terpy (PSP2T2)                                                |                                       | 120               | 0                            | 100%                   | 24          | Nat. Chem. 2018, 10, 1201-1206                  |
| Co-Cyt b <sub>562</sub>                                                  | [Ru(bpy) <sub>3</sub> ] <sup>2+</sup> | 42                | 143                          | 23%                    | 8           | Frontiers in Molecular Biosciences 2021, 8 (17) |
| (A3A3')Y26C-Co(III)Mal-PPIXMME                                           | [Ru(bpy) <sub>3</sub> ] <sup>2+</sup> | 80*               | 163*                         | 33%*                   | ~20         | Int. J. Mol. Sci. 2022, 23, 14640.              |
| CoMb                                                                     | [Ru(bpy) <sub>3</sub> ] <sup>2+</sup> | 2000 (280)        | 11300 (100)                  | 15% (74%)              | 2           | Angew. Chem. 2023, e202215719                   |
| CoMP11-Ac                                                                | Electrochemical                       | 32,000 (1500)     | 4,600 (80)                   | 61% (88%)              | 24 (2)      | ACS Catal. 2022, 12, 23, 14689-14697            |

\*Results were not provided for the same experimental conditions for H<sub>2</sub> and CO



**Table S2.** Comparison of results on CoMC6\*a and CoMP11-Ac<sup>a</sup>

|                                                    | <b>Buffer</b>                  | <b>Catalyst</b> | <b>FE<sub>(H<sub>2</sub>)</sub> %</b> | <b>FE<sub>(CO)</sub> %</b> | <b>TON<sub>(H<sub>2</sub>)</sub></b> | <b>TON<sub>(CO)</sub></b> | <b>Q<sub>T</sub> (C)</b> |
|----------------------------------------------------|--------------------------------|-----------------|---------------------------------------|----------------------------|--------------------------------------|---------------------------|--------------------------|
| <b>CO<sub>2</sub></b><br><b>-1.4 V<sup>b</sup></b> | CAPS<br>(pK <sub>a</sub> 10.4) | CoMP11-Ac       | 29 ± 6                                | 48 ± 10                    | 280 ± 10                             | 470 ± 10                  | 0.9 ± 0.2                |
|                                                    |                                | CoMC6*a         | 4 ± 1                                 | 76 ± 10                    | 110 ± 20                             | 2100 ± 600                | 2.6 ± 0.4                |
|                                                    | CHES<br>(pK <sub>a</sub> 9.3)  | CoMP11-Ac       | 43 ± 9                                | 57 ± 4                     | 940 ± 30                             | 1300 ± 300                | 2.2 ± 0.3                |
|                                                    |                                | CoMC6*a         | 14 ± 1                                | 67 ± 12                    | 280 ± 10                             | 1300 ± 400                | 1.9 ± 0.1                |
|                                                    | MOPS<br>(pK <sub>a</sub> 7.2)  | CoMP11-Ac       | 63 ± 13                               | 21 ± 5                     | 4100 ± 500                           | 1400 ± 500                | 6.4 ± 0.8                |
|                                                    |                                | CoMC6*a         | 24 ± 4                                | 68 ± 8                     | 390 ± 120                            | 1100 ± 200                | 1.6 ± 0.5                |
| <b>CO<sub>2</sub></b><br><b>-1.2 V<sup>b</sup></b> | CAPS<br>(pK <sub>a</sub> 10.4) | CoMP11-Ac       | 5 ± 1                                 | 88 ± 11                    | 80 ± 20                              | 1500 ± 300                | 1.7 ± 0.6                |
|                                                    |                                | CoMC6*a         | 4 ± 4                                 | 73 ± 5                     | 11 ± 10                              | 230 ± 10                  | 0.3 ± 0.1                |
|                                                    | CHES<br>(pK <sub>a</sub> 9.3)  | CoMP11-Ac       | 6 ± 1                                 | 81 ± 2                     | 250 ± 30                             | 3500 ± 300                | 4.2 ± 0.4                |
|                                                    |                                | CoMC6*a         | 11 ± 1                                | 86 ± 11                    | 100 ± 20                             | 800 ± 200                 | 0.9 ± 0.1                |
|                                                    | MOPS<br>(pK <sub>a</sub> 7.2)  | CoMP11-Ac       | 8 ± 2                                 | 85 ± 2                     | 1200 ± 100                           | 12000 ± 1000              | 14.1 ± 1.4               |
|                                                    |                                | CoMC6*a         | 6 ± 1                                 | 85 ± 11                    | 160 ± 40                             | 2200 ± 300                | 2.5 ± 0.2                |

<sup>a</sup>Results on CoMP11-Ac from SI ref. 4. Two-hour CPE experiments were conducted on 1 μM catalyst in 0.5 M buffer with 1 M KCl. Data shown corresponds to the average of at least three individual runs, the error corresponds to the difference between the average and the replicate with the greatest difference from the average. Activity is not reported if it did not exceed three times background in more than one replicate. The pH of all solutions under CO<sub>2</sub> 6.5

<sup>b</sup>Potentials reported vs. Ag/AgCl/KCl(1M).

## Results of CPEs of CoMC6\*a in MOPS, CHES, CAPS

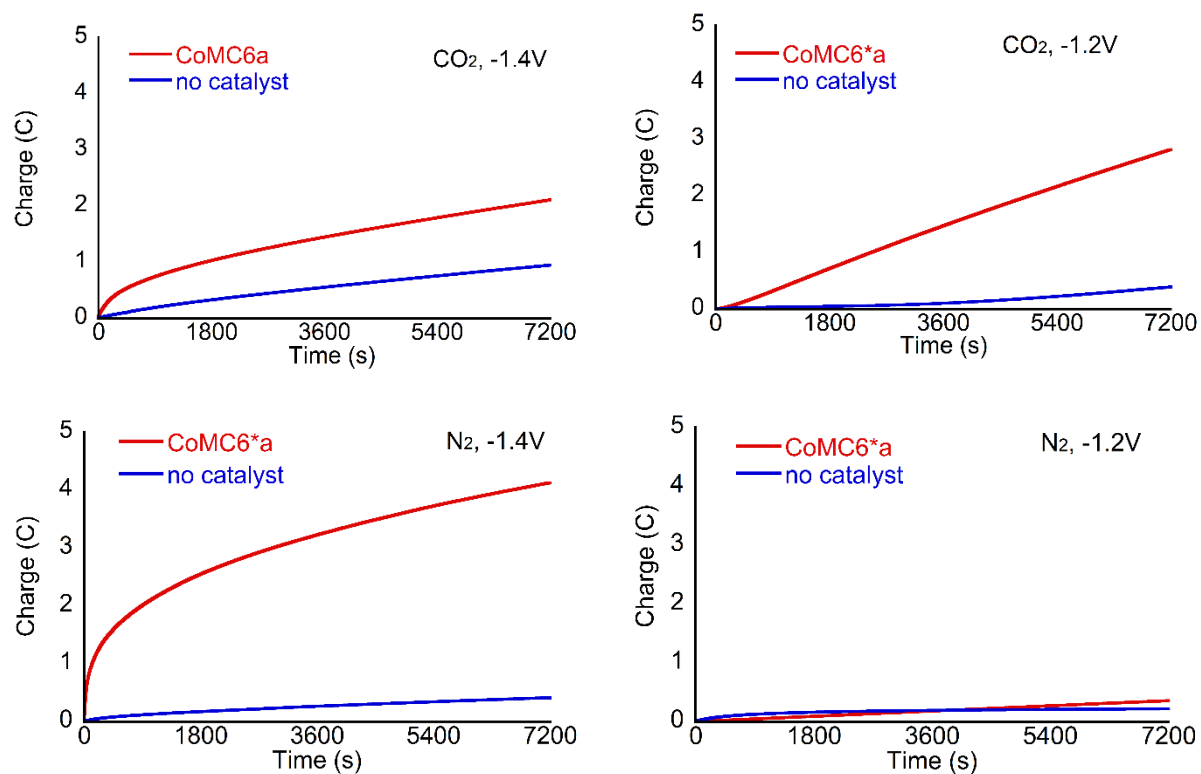

**Figure S5.** CPE experiments run in 0.5 M MOPS, 1 M KCl, and 1  $\mu$ M CoMC6\*a, when present. Results, as labeled in the figure, are from CPE run in CO<sub>2</sub>-saturated solution at -1.4 V (upper left), CO<sub>2</sub>-saturated solution at -1.2 V (upper right), N<sub>2</sub>-saturated solution at -1.4 V (lower left), and N<sub>2</sub>-saturated solution at -1.2 V (lower right). The pH of all MOPS and CAPS solutions after purging with CO<sub>2</sub> was  $6.5 \pm 0.1$ ; and  $7.2 \pm 0.2$  when purged with N<sub>2</sub>. Potentials are reported vs. Ag/AgCl/KCl<sub>(1M)</sub>.

**Table S3.** Results of 2-hour CPE experiments on 1  $\mu\text{M}$  CoMC6\*a in 0.5 M MOPS, 1 M KCl<sup>a</sup>

|                 | E (V) | FE(H <sub>2</sub> )                       | FE(CO) | TON(H <sub>2</sub> ) | TON(CO) | Q <sub>T</sub> (C) |
|-----------------|-------|-------------------------------------------|--------|----------------------|---------|--------------------|
| CO <sub>2</sub> | -1.4  | 26                                        | 69     | 500                  | 1300    | 1.8                |
|                 |       | 24                                        | 60     | 510                  | 1300    | 2.1                |
|                 |       | 24                                        | 77     | 310                  | 980     | 1.2                |
|                 |       | 20                                        | 70     | 270                  | 960     | 1.3                |
|                 |       | 25                                        | 66     | 340                  | 910     | 1.3                |
|                 | -1.2  | 7                                         | 94     | 190                  | 2500    | 2.5                |
|                 |       | 5                                         | 74     | 130                  | 1900    | 2.5                |
|                 |       | 7                                         | 86     | 190                  | 2400    | 2.7                |
| 5               |       | 87                                        | 120    | 2200                 | 2.4     |                    |
| N <sub>2</sub>  | -1.4  | 99                                        | 1      | 5400                 | 49      | 5.3                |
|                 |       | 97                                        | 1      | 2900                 | 34      | 2.8                |
|                 |       | 92                                        | 1      | 3500                 | 52      | 3.6                |
|                 | -1.2  | No above-background activity <sup>b</sup> |        |                      |         |                    |

<sup>a</sup>Two-hour CPE experiments conducted for 1  $\mu\text{M}$  catalyst in 0.5 M buffer with 1 M KCl. The pH of all MOPS and CAPS solutions after purging with CO<sub>2</sub> was  $6.5 \pm 0.1$ ; and  $7.2 \pm 0.2$  when purged with N<sub>2</sub>. Potentials reported vs. Ag/AgCl/KCl<sub>(1M)</sub>. <sup>b</sup>Activity is not reported if activity was not three times background in more than one replicate.

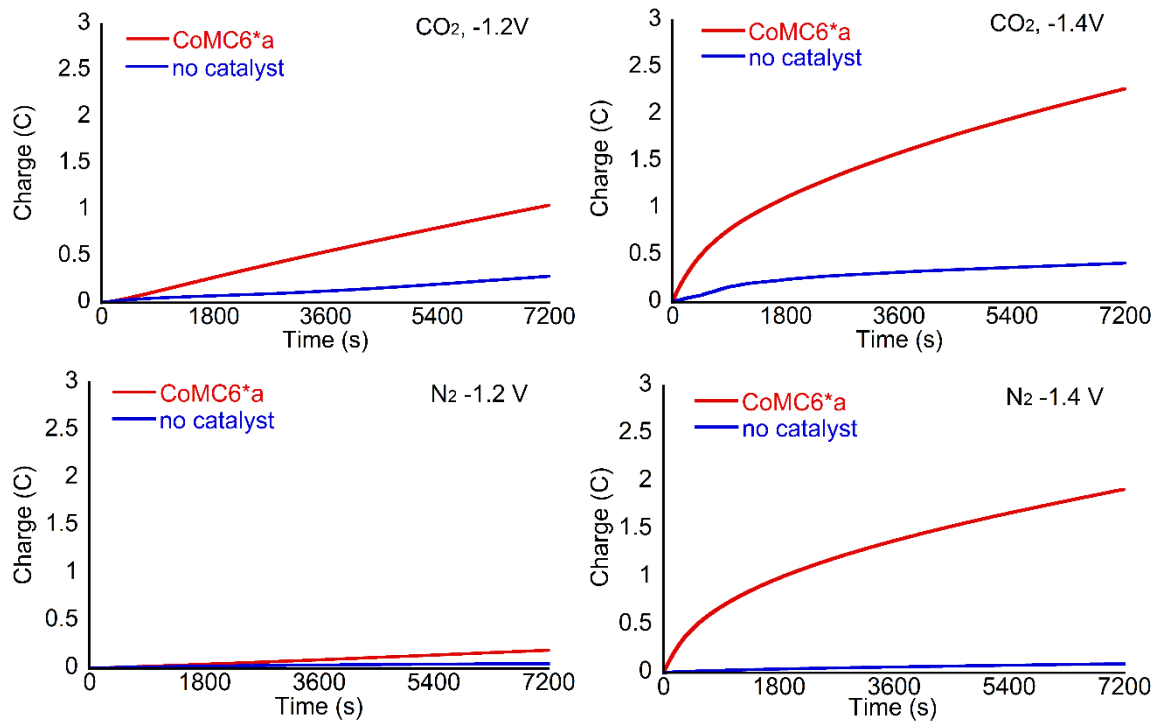

**Figure S6.** CPE experiments run in 0.5 M CHES, 1 M KCl, the concentration of catalyst was 1  $\mu$ M when present. CPE run in (a) CO<sub>2</sub>-saturated solution at -1.4 V, (b) CO<sub>2</sub>-saturated solution at -1.2 V, (c) N<sub>2</sub>-saturated solution at -1.4 V, and (d) N<sub>2</sub>-saturated solution at -1.2 V. pH = 6.6  $\pm$  0.1 for (a) and (b), and 7.1  $\pm$  0.3 for (c) and (d). Potentials reported vs. Ag/AgCl/KCl<sub>(1M)</sub>

**Table S4.** Results of 2-hour CPEs of 1  $\mu\text{M}$  CoMC6\*a in 0.5 M CHES, 1 M KCl<sup>a</sup>

|                 | E (V) | FE(H <sub>2</sub> ) | FE(CO) | TON(H <sub>2</sub> ) | TON(CO) | Q <sub>T</sub> (C) |
|-----------------|-------|---------------------|--------|----------------------|---------|--------------------|
| CO <sub>2</sub> | -1.4  | 14                  | 60     | 270                  | 1100    | 1.8                |
|                 |       | 13                  | 79     | 280                  | 1700    | 2.0                |
|                 |       | 15                  | 62     | 290                  | 1200    | 1.9                |
|                 | -1.2  | 11                  | 81     | 88                   | 646     | 0.8                |
|                 |       | 11                  | 97     | 120                  | 1000    | 1.0                |
|                 |       | 10                  | 79     | 87                   | 710     | 0.9                |
| N <sub>2</sub>  | -1.4  | ~100                | ~0     | 1900                 | ~0      | 1.8                |
|                 |       | 83                  | ~0     | 1600                 | ~0      | 1.8                |
|                 |       | ~100                | ~0     | 1900                 | ~0      | 1.8                |
|                 | -1.2  | 66                  | ~0     | 100                  | ~0      | 0.1                |
|                 |       | 92                  | ~0     | 130                  | ~0      | 0.1                |
|                 |       | 76                  | ~0     | 160                  | ~0      | 0.2                |

<sup>b</sup>Two-hour CPE experiments conducted for 1  $\mu\text{M}$  catalyst in 0.5 M buffer with 1 M KCl. The pH of all MOPS, CHES and CAPS solutions after purging with CO<sub>2</sub> was  $6.5 \pm 0.1$ ; and  $7.2 \pm 0.2$  when purged with N<sub>2</sub>. Potentials reported vs. Ag/AgCl/KCl<sub>(1M)</sub>.

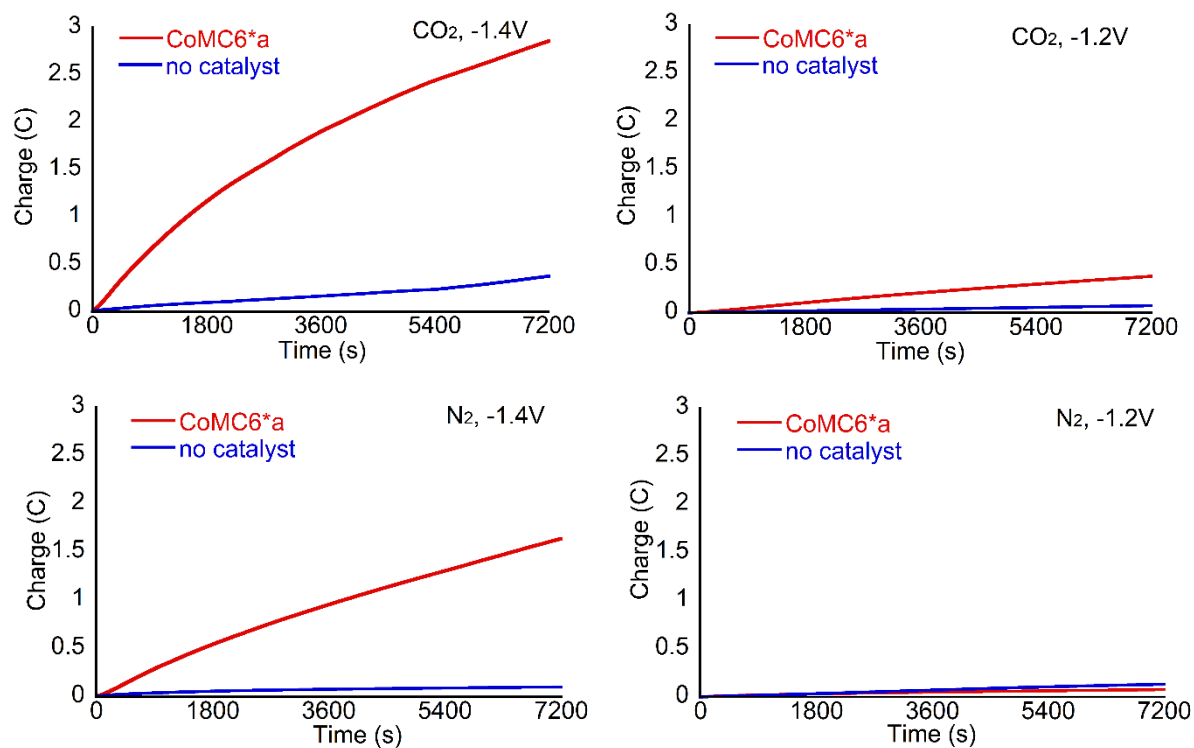

**Figure S7.** CPE experiments run in 0.5 M CAPS, 1 M KCl, the concentration of catalyst was 1  $\mu$ M when present. CPE run in (upper left) CO<sub>2</sub>-saturated solution at -1.4 V, (upper right) CO<sub>2</sub>-saturated solution at -1.2 V, (lower left) N<sub>2</sub>-saturated solution at -1.4 V, and (lower right) N<sub>2</sub>-saturated solution at -1.2 V. The pH of all MOPS and CAPS solutions after purging with CO<sub>2</sub> was  $6.5 \pm 0.1$ ; and  $7.2 \pm 0.2$  when purged with N<sub>2</sub>. Potentials reported vs. Ag/AgCl/KCl<sub>(1M)</sub>.

**Table S5.** Results of 2-hour CPE experiments on 1  $\mu\text{M}$  CoMC6\*a in 0.5 M CAPS, 1 M KCl<sup>a</sup>

|                 | E (V) | FE(H <sub>2</sub> )                       | FE(CO) | TON(H <sub>2</sub> ) | TON(CO) | Q <sub>T</sub><br>(C) |
|-----------------|-------|-------------------------------------------|--------|----------------------|---------|-----------------------|
| CO <sub>2</sub> | -1.4  | 4                                         | 85     | 130                  | 2600    | 2.9                   |
|                 |       | 4                                         | 77     | 120                  | 2100    | 2.6                   |
|                 |       | 4                                         | 73     | 120                  | 2000    | 2.7                   |
|                 |       | 4                                         | 69     | 97                   | 1500    | 2.2                   |
|                 | -1.2  | 6                                         | 77     | 18                   | 230     | 0.4                   |
|                 |       | 5                                         | 73     | 16                   | 220     | 0.4                   |
|                 |       | 0                                         | 68     | 0                    | 240     | 0.4                   |
| N <sub>2</sub>  | -1.4  | 91                                        | ~0     | 810                  | ~0      | 1.0                   |
|                 |       | 96                                        | ~0     | 1500                 | ~0      | 1.6                   |
|                 |       | 76                                        | ~0     | 970                  | ~0      | 1.4                   |
|                 | -1.2  | No above-background activity <sup>b</sup> |        |                      |         |                       |

<sup>a</sup>Two-hour CPE experiments conducted for 1  $\mu\text{M}$  catalyst in 0.5 M buffer with 1 M KCl. The pH of all MOPS and CAPS solutions after purging with CO<sub>2</sub> was  $6.5 \pm 0.1$ ; and  $7.2 \pm 0.2$  when purged with N<sub>2</sub>. Potentials reported vs. Ag/AgCl/KCl<sub>(1M)</sub>. <sup>b</sup>Activity is not reported if activity was not three times background in more than one replicate.

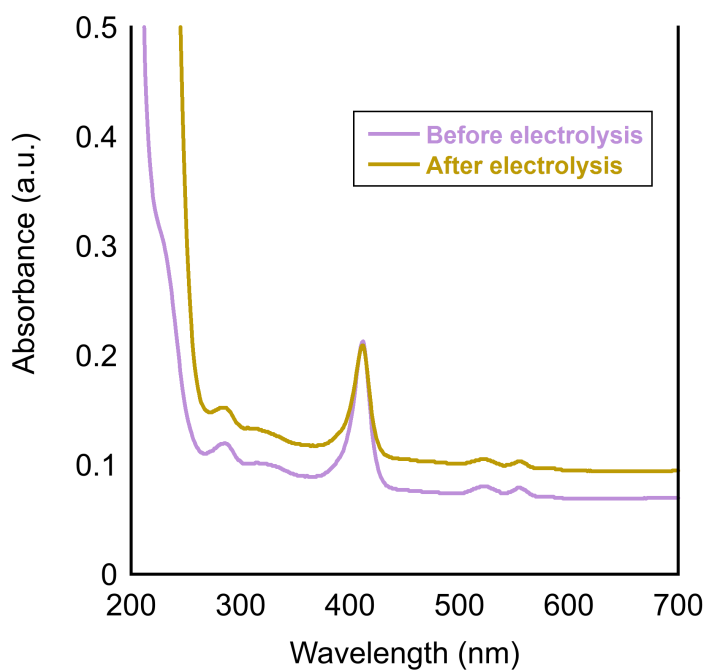

**Fig. S8.** UV-Vis spectra of 1  $\mu\text{M}$  CoMC6\*a taken in 1 M KCl before and after bulk electrolysis at -1.2 V for 2 hrs, with  $\text{CO}_2/\text{CH}_4$  purged for 15 minutes. The data were collected in the absence of MOPS, CHES, or CAPS buffer because oxidation of the buffers during catalysis yields a species that interferes with the absorption measurement.



### Additional CV data

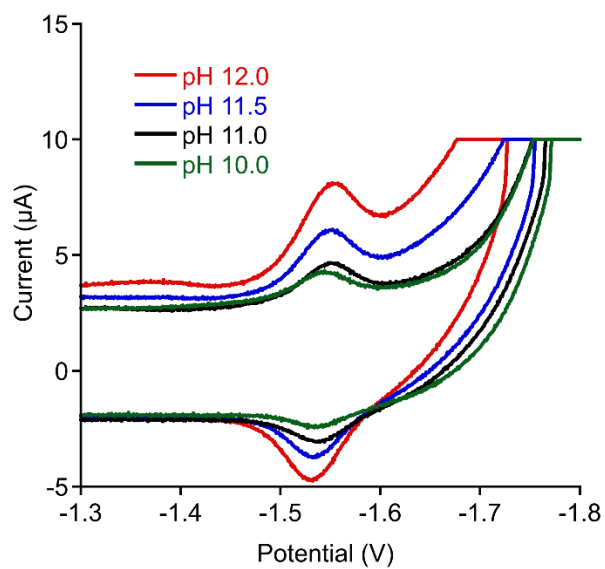

**Fig S9.** CVs of  $1 \mu\text{M}$  CoMC6\*a in  $0.1 \text{ M}$  KCl, under  $1 \text{ atm}$   $\text{N}_2$  at  $5 \text{ V/s}$  at pH 10-12 as indicated.

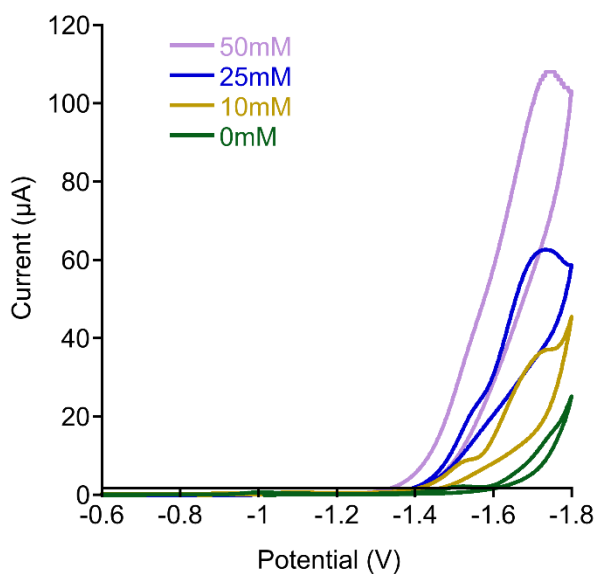

**Fig S10.** CVs of 1  $\mu\text{M}$  CoMC6\*a in different CHES concentrations with 0.1 M KCl, pH  $6.3 \pm 0.05$ , under 1 atm  $\text{N}_2$ , at 100mV/s.

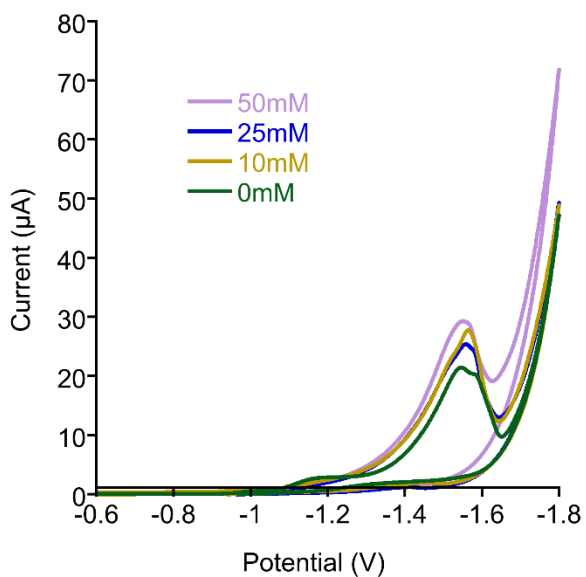

**Fig S11.** CVs of 1  $\mu\text{M}$  CoMC6\*a in different CHES concentrations with 0.1 M KCl, pH  $6.3 \pm 0.05$ , under 1 atm  $\text{CO}_2$ , at 100mV/s.

## Extended (24-hour) CPE experiments

**Table S6.** Results of 24-hour CPE experiments on 1  $\mu\text{M}$  indicated catalyst in 0.5 M MOPS, 1 M KCl under  $\text{CO}_2$ <sup>a</sup>

| Buffer                 | E (V) <sup>b</sup> | FE( $\text{H}_2$ ) | FE(CO)      | TON( $\text{H}_2$ ) | TON(CO)           | $Q_T$ (C)  |
|------------------------|--------------------|--------------------|-------------|---------------------|-------------------|------------|
| CoMC6*a                | -1.2               | $5 \pm 1$          | $86 \pm 5$  | $810 \pm 170$       | $14,000 \pm 60$   | $16 \pm 1$ |
| CoMP11-Ac <sup>4</sup> | -1.2               | $9 \pm 2$          | $61 \pm 15$ | $4600 \pm 300$      | $32,000 \pm 9000$ | $51 \pm 7$ |

<sup>a</sup>Data shown corresponds to the average of at least two individual runs. <sup>b</sup>Potentials reported vs. Ag/AgCl/KCl(1M).

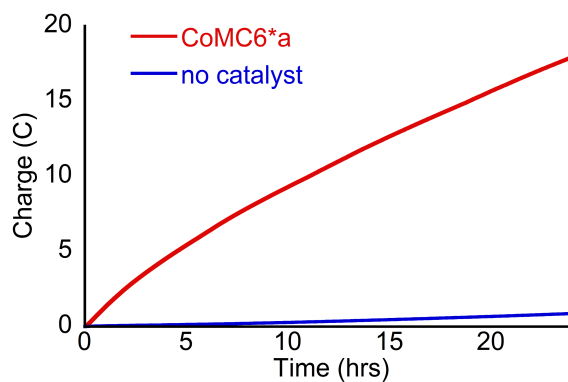

**Figure S12.** CPE experiments run in 0.5 M MOPS, 1 M KCl, under  $\text{CO}_2$  at -1.2 V, the concentration of CoMC6\*a was 1  $\mu\text{M}$  when present.

## GC calibration curves and chromatogram

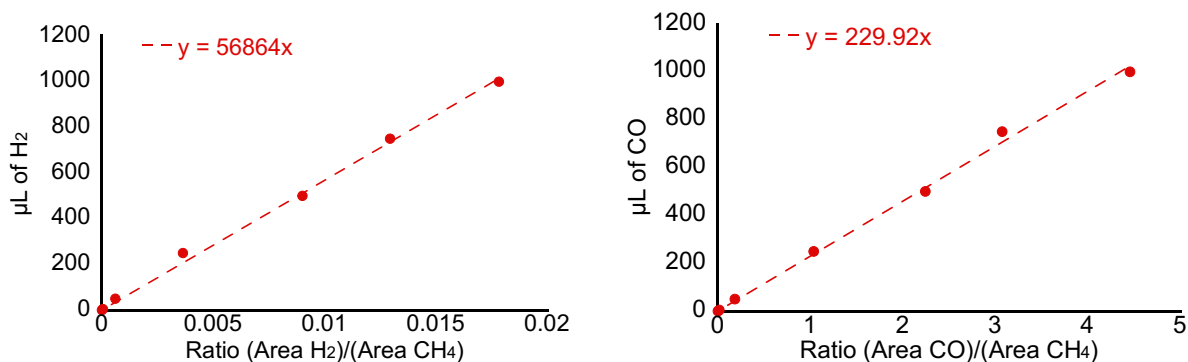

**Figure S12.** Calibration curves for the quantification of H<sub>2</sub> (left) and CO (right), with 95:5% CO<sub>2</sub>:CH<sub>4</sub> as the purging gas.

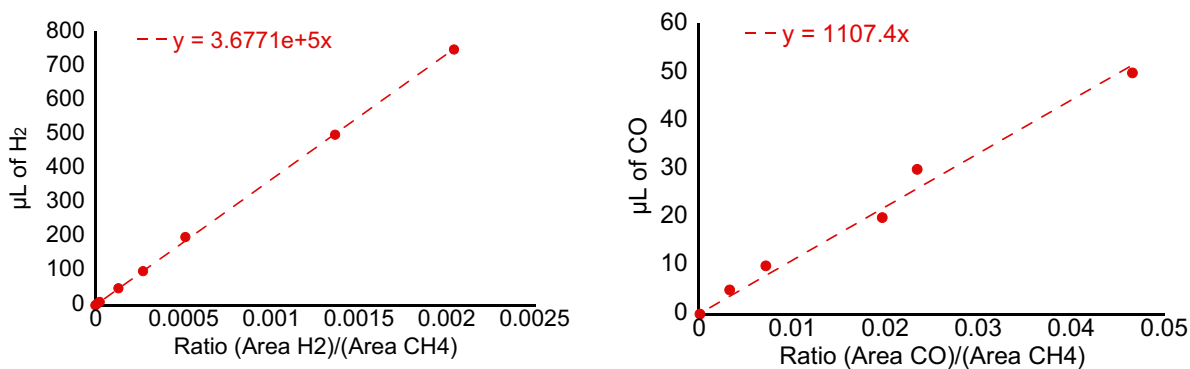

**Figure S13.** Calibration curves for the quantification of H<sub>2</sub> with 80:20% N<sub>2</sub>:CH<sub>4</sub> as the purging gas. (Left) H<sub>2</sub> (Right) CO.

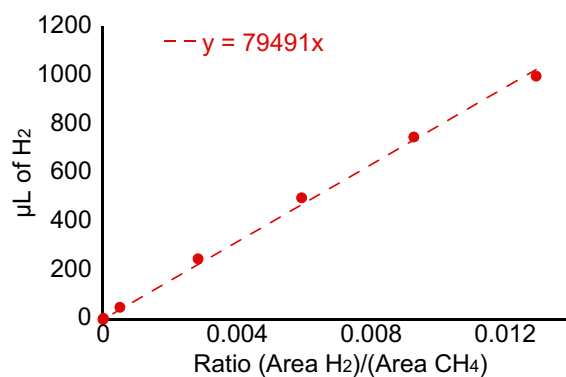

**Figure S14.** Calibration curve for the quantification of H<sub>2</sub> with 95:5% CO<sub>2</sub>:CH<sub>4</sub> as the purging gas in an H-cell with connected headspaces.

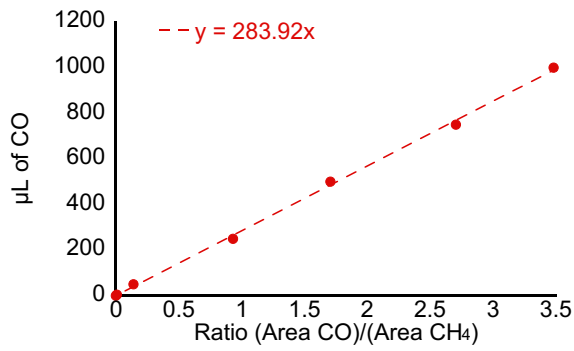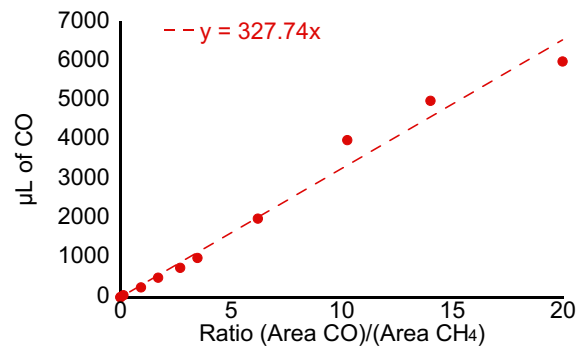

**Figure S15.** Calibration curves for the quantification of CO with 95:5% CO<sub>2</sub>:CH<sub>4</sub> as the purging gas in an H-cell with connected headspaces. (Left) Low volumes. (Right) High volumes.

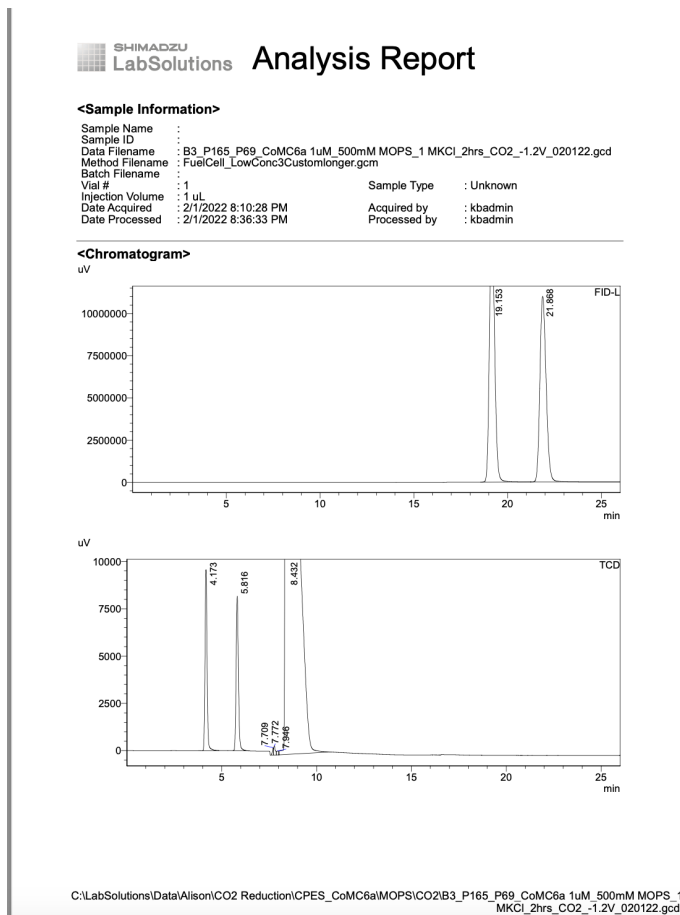

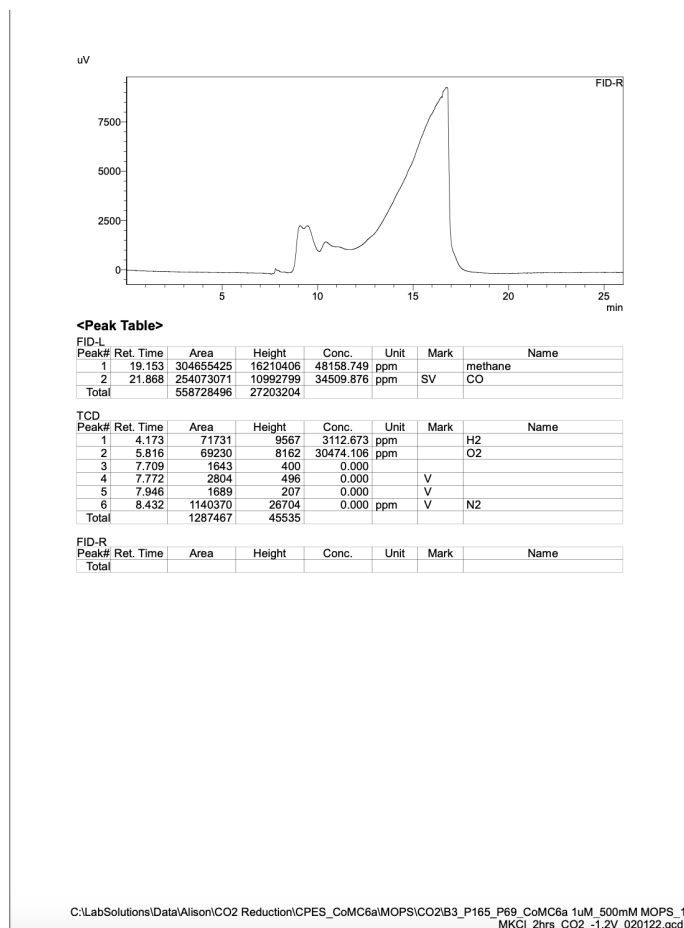

**Figure S16.** Example of GC chromatogram

## References

1. V. Firpo, J. M. Le, V. Pavone, A. Lombardi and K. L. Bren, Hydrogen evolution from water catalyzed by cobalt-mimochrome VI\*a, a synthetic mini-protein, *Chem. Sci.*, 2018, **9**, 8582-8589.
2. G. Caserta, M. Chino, V. Firpo, G. Zambrano, L. Leone, D. D'Alonzo, F. Natri, O. Maglio, V. Pavone and A. Lombardi, Enhancement of Peroxidase Activity in Artificial Mimochrome VI Catalysts through Rational Design, *ChemBioChem*, 2018, **19**, 1823-1826.
3. E. H. Edwards, J. M. Le, A. A. Salamatian, N. L. Peluso, L. Leone, A. Lombardi and K. L. Bren, A cobalt mimochrome for photochemical hydrogen evolution from neutral water, *J. Inorg. Biochem.*, 2022, **230**, 111753.
4. J. L. Alvarez-Hernandez, A. A. Salamatian, J. W. Han and K. L. Bren, Potential- and Buffer-Dependent Selectivity for the Conversion of CO<sub>2</sub> to CO by a Cobalt Porphyrin-Peptide Electrocatalyst in Water, *ACS Catal.*, 2022, DOI: 10.1021/acscatal.2c03297, 14689-14697.
